# Supplementary material for: Designing stimuli-responsive upconversion nanoparticles based on a mimetic immunoassay for potential accurate diabetic nephropathy diagnosis
Source: Royal Society of Chemistry journal article supplement (doi:10.1039/d3an01041d), 2023-01-01
Supplement: d3an01041d1.pdf [file d3an01041d1.pdf]

## **Supporting Information**

### **Designing Stimuli-Responsive Upconversion Nanoparticles Based on Mimetic Immunoassay for Potential Diabetic Nephropathy Accuracy Diagnosis**

Yiting Wang, Yang Hu, Ru Wang, Wei Zhang, Huiting Mao, Chuanjun Yuan\* and  
Ruinian Hua\*

*College of Life Sciences, Dalian Minzu University, Dalian 116100, Liaoning, P.R.  
China*

#### **\*Corresponding author**

E-mail: rnhua@dlnu.edu.cn (R. N. Hua); ycj@dlnu.edu.cn (C. J. Yuan)

Tel: +86-411-87656220; Fax: +86-411-87656220

## **Supporting information Included:**

### **1. Experimental details**

#### 1.1 Instrumentations

### **2. Supplemental tables and figures**

**Table S1.** Core/shell UCNPs SAED measurement data.

**Table S2.** The SA analysis results of healthy volunteers urea samples using the fluorescent method.

**Table S3.** Descriptive statistics of the SA analysis results of healthy volunteers urea samples.

**Figure S1.** Fourier transform infrared spectra (FTIR) of OA-capped core-only UCNPs, core/shell UCNPs, ligand-free core/shell UCNPs and PAA-UCNPs.

**Figure S2.** Thermogravimetric analyses (TGA) curves of OA-capped core/shell UCNPs, ligand-free core/shell UCNPs and PAA-UCNPs conducted from 30°C to 700°C at a rate of 10°C/min under N<sub>2</sub> atmosphere protection.

**Figure S3.** <sup>1</sup>H NMR spectrum of PAA-UCNPs.

**Figure S4.** Effect of ionic strength on fluorescence intensity of detection system. Conditions: detection of 5 μmol/L SA under 980 nm laser excitation (1.0 W).

**Figure S5.** Correlation plots between the determined values of SA in urine samples obtained using our proposed method and that from the conventional ELISA assay.

# 1. Experimental details

## 1.1 Instrumentations

The selected area electron diffraction (SAED) pattern of the nanoparticles and Fourier transform of the transmission electron microscope (TEM) image were gained from JEM-2100 microscope (JOEL, Japan) operated at 200 kV acceleration voltage. The morphology and crystal lattice of the nanoparticles were achieved using a JEM-2100F microscope (JOEL, Japan), operated at a voltage of 200 kV. The X-ray diffraction pattern (XRD) of nanoparticles were analyzed by a X-ray diffractometer which model is Shimadzu XRD-6000 with Cu-K $\alpha$  irradiation ( $\lambda = 0.15406$  nm), the scanning range was 10° to 80° and the scanning rate was 2° per minute. Upconversion fluorescence spectra was obtained from an FS5 luminescence spectrometer (Edinburgh, UK) loaded with a 980 nm laser (WaveParticle Technology, China). Fourier transform infrared spectra (FT-IR) were measured by the IRAffinity-1 spectrophotometer (Shimadzu, Japan). The <sup>1</sup>H NMR spectrum of PAA-UCNPs were characterized by <sup>1</sup>H nuclear magnetic resonance (Mercury plus400, Agilent-Varian, USA). UV-Vis absorption spectrum were recorded by UH4150 (Hitachi, Japan). Zeta potential measurement of the samples were operated on a Nano particle Analyzer (Horiba SZ-100)

## 2. Supplemental Tables and Figures

**Table S1.** Core/shell UCNPs SAED measurement data.

| Measured length (1/nm) | d spacing (Å) | Crystal plane |
|------------------------|---------------|---------------|
| 7.7115                 | 2.5935        | (200)         |
| 10.7416                | 1.8619        | (204)         |
| 12.9364                | 1.5460        | (303)         |
| 14.7868                | 1.2669        | (118)         |

**Table S2.** The SA analysis results of the urea samples using the fluorescent method.

| Sample Number | Analysis Results<br>(Concentration, $\mu\text{mol/L}$ ) | Urine Concentration<br>of SA (mg/dL) |
|---------------|---------------------------------------------------------|--------------------------------------|
| 1             | 5.6550 $\pm$ 0.3615                                     | 8.7446 $\pm$ 0.5590                  |
| 2             | 6.0511 $\pm$ 0.3103                                     | 9.3572 $\pm$ 0.4798                  |
| 3             | 4.6872 $\pm$ 0.1512                                     | 7.2481 $\pm$ 0.2338                  |
| 4             | 6.3842 $\pm$ 0.5504                                     | 9.8722 $\pm$ 0.8511                  |
| 5             | 6.1721 $\pm$ 0.1894                                     | 9.5443 $\pm$ 0.2929                  |
| 6             | 6.1479 $\pm$ 0.4798                                     | 9.5068 $\pm$ 0.7420                  |
| 7             | 7.8654 $\pm$ 0.0406                                     | 12.1628 $\pm$ 0.0628                 |
| 8             | 6.8116 $\pm$ 0.2450                                     | 10.5331 $\pm$ 0.3788                 |
| 9             | 6.7248 $\pm$ 0.1903                                     | 10.3989 $\pm$ 0.2943                 |
| 10            | 5.6664 $\pm$ 0.2460                                     | 8.7622 $\pm$ 0.3804                  |
| 11            | 6.0057 $\pm$ 0.3593                                     | 9.2869 $\pm$ 0.5556                  |
| 12            | 7.1201 $\pm$ 0.1873                                     | 11.0102 $\pm$ 0.2896                 |
| 13            | 7.2564 $\pm$ 0.3091                                     | 11.2209 $\pm$ 0.4780                 |
| 14            | 6.9260 $\pm$ 0.0610                                     | 10.7100 $\pm$ 0.0944                 |
| 15            | 7.4350 $\pm$ 0.1861                                     | 11.4970 $\pm$ 0.2877                 |
| 16            | 4.1241 $\pm$ 0.2696                                     | 6.3772 $\pm$ 0.4169                  |
| 17            | 6.1586 $\pm$ 0.5123                                     | 9.5234 $\pm$ 0.7923                  |
| 18            | 6.5698 $\pm$ 0.1974                                     | 10.1592 $\pm$ 0.3052                 |
| 19            | 4.1391 $\pm$ 0.0476                                     | 6.4006 $\pm$ 0.0736                  |
| 20            | 5.1664 $\pm$ 0.4808                                     | 7.9890 $\pm$ 0.7434                  |

\*Analysis results were the post-treated urine sialic acid concentration.

**Table S3.** Descriptive statistics of the SA analysis results of healthy volunteers urea samples.

|                    | <b>Urine SA</b> | <b>Std. Error of Detection</b> |
|--------------------|-----------------|--------------------------------|
| N                  | 20              | 20                             |
| Range              | 5.7855          | 0.7883                         |
| Minimum            | 6.3772          | 0.0628                         |
| Maximum            | 12.1618         | 0.8511                         |
| Mean               | 9.5152          | 0.4156                         |
| Std. Error of Mean | 0.3559          | 0.0525                         |
| Std. Deviation     | 1.5915          | 0.2349                         |
| Variance           | 2.533           | 0.0550                         |

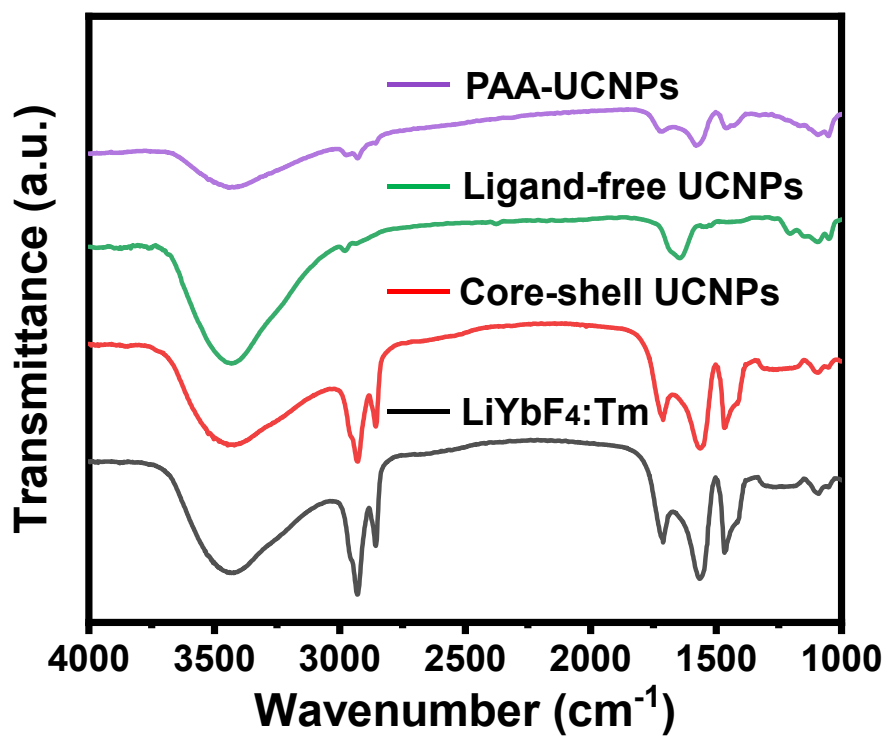

**Fig. S1.** Fourier transform infrared spectra (FTIR) of OA-capped core-only UCNPs, core/shell UCNPs, ligand-free core/shell UCNPs and PAA-UCNPs.

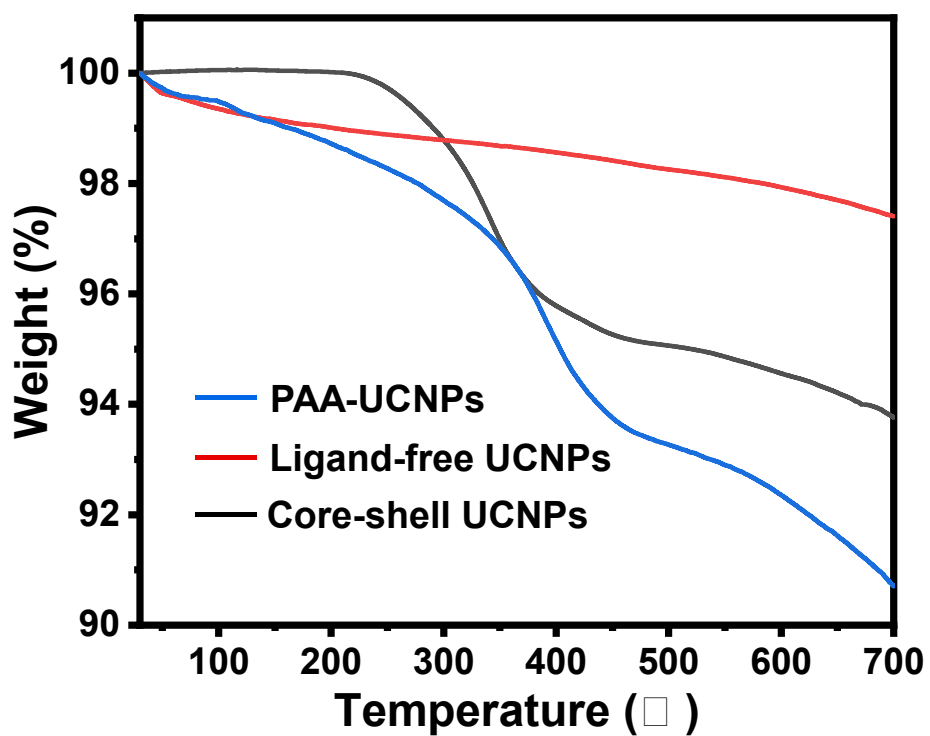

**Fig. S2.** Thermogravimetric analyses (TGA) curves of OA-capped core/shell UCNPs, ligand-free core/shell UCNPs and PAA-UCNPs conducted from 30°C to 700°C at a rate of 10°C/min under N<sub>2</sub> atmosphere protection.



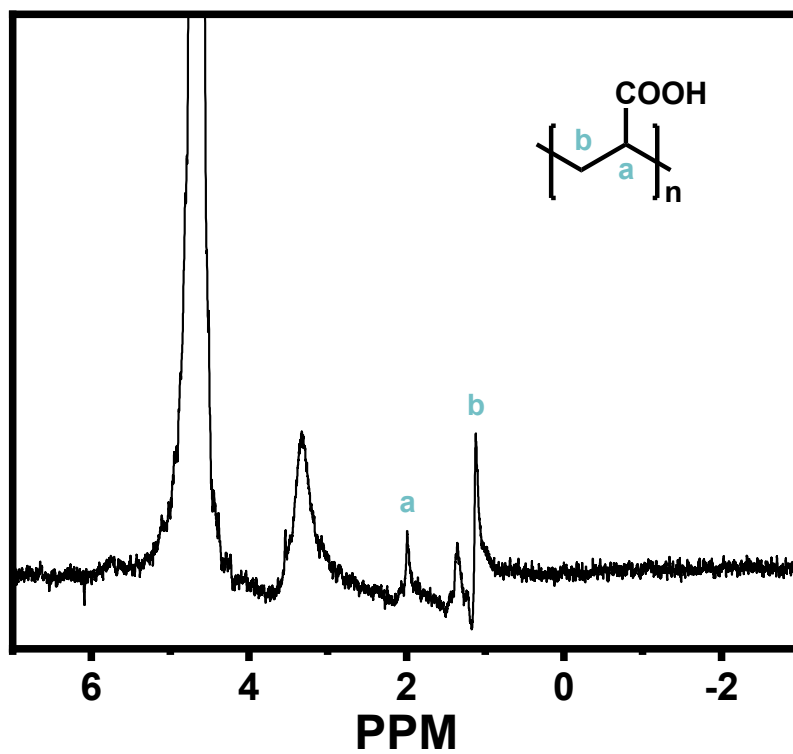

**Fig. S3.**  $^1\text{H}$  NMR spectrum of PAA-UCNPs used deuterated water as solvent.

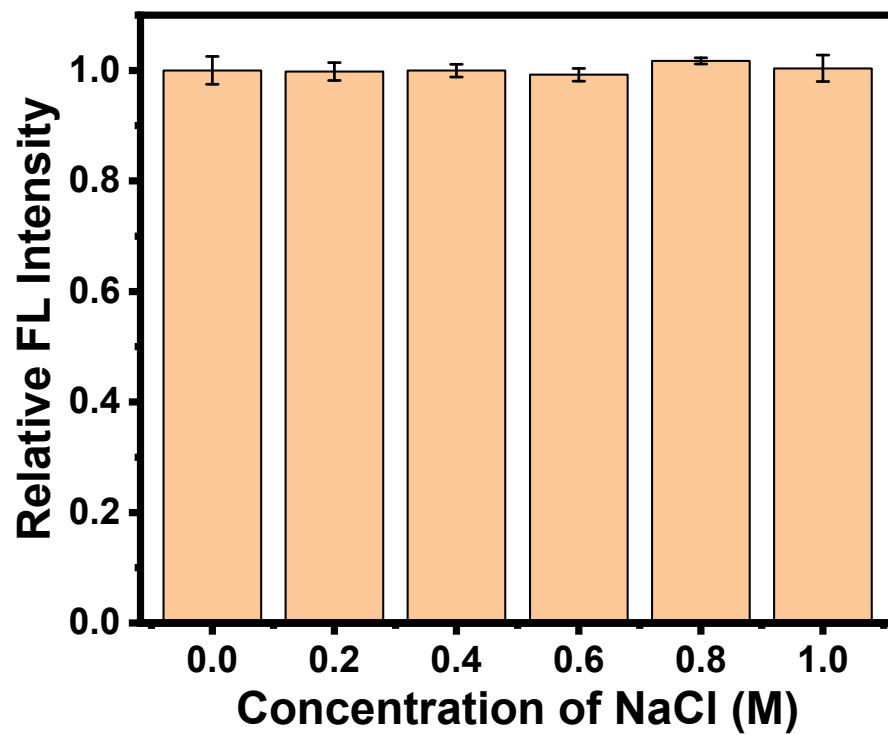

**Fig. S4.** Effect of ionic strength on fluorescence intensity of detection system. Conditions: detection of 5  $\mu\text{mol/L}$  SA under 980 nm laser excitation (1.0 W).

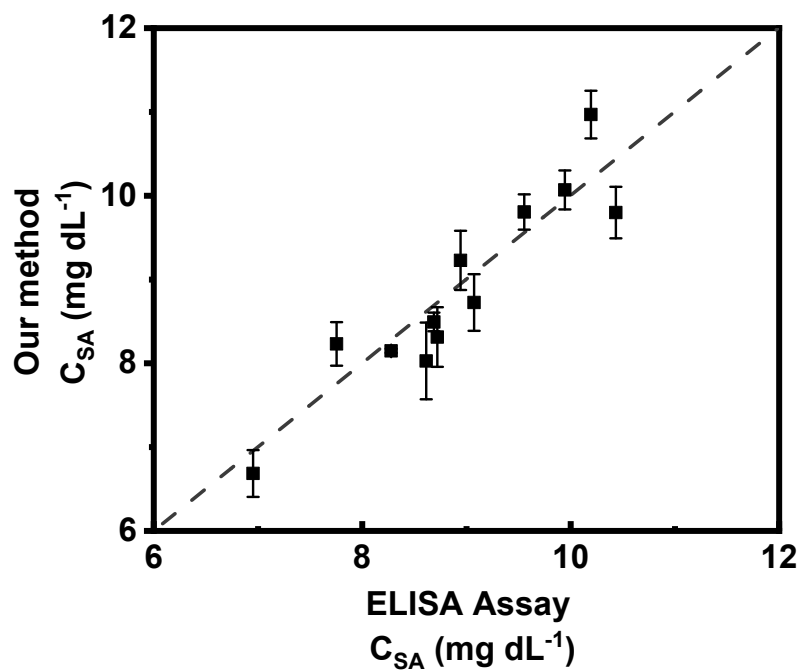

**Fig. S5.** Correlation plots between the determined values of SA in urine samples obtained using our proposed method and that from the conventional ELISA assay.
